# Supplementary material for: Cross sections for low-energy electron scattering from adenine in the condensed phase
Source: Royal Society of Chemistry journal article supplement (doi:10.1039/b612700b), 2006-11-24
Supplement: b612700b.pdf [file b612700b.pdf]

Electronic Supplementary Material for PCCP  
 This journal is © The Owner Societies 2006

**Table S1:** Integral cross sections (over the half-space angle) for electron induced vibrational excitation of molecules in a thin film of condensed adenine, in units of  $10^{-17} \text{ cm}^2$ .

| $E_0$<br>(eV) | Energy loss (meV) |     |      |     |     |     |     |     |     |     |     |      |     |
|---------------|-------------------|-----|------|-----|-----|-----|-----|-----|-----|-----|-----|------|-----|
|               | 64                | 84  | 106  | 126 | 154 | 174 | 194 | 204 | 385 | 435 | 415 | 335  | 353 |
| 1.5           | 3.3               | 2.7 | 1.9  | 0.9 | 1.0 | 1.1 | 0.9 | 1.1 | 0.7 | 1.0 | 0.5 | 0.03 | 0.3 |
| 2             | 4.0               | 3.2 | 2.5  | 1.4 | 1.2 | 1.6 | 1.3 | 1.8 | 1.3 | 1.7 | 0.6 | 0.07 | 0.4 |
| 3             | 6.3               | 5.1 | 4.2  | 2.2 | 2.1 | 2.6 | 2.2 | 2.6 | 2.3 | 2.3 | 0.9 | 0.1  | 0.6 |
| 4             | 6.7               | 5.0 | 4.2  | 2.2 | 2.3 | 2.7 | 1.9 | 2.7 | 2.2 | 1.6 | 0.7 | 0.1  | 0.6 |
| 5             | 8.6               | 6.1 | 5.2  | 3.4 | 3.6 | 4.3 | 4.1 | 3.3 | 3.4 | 1.9 | 1.3 | 0.6  | 1.0 |
| 6             | 3.0               | 2.2 | 1.7  | 1.2 | 1.6 | 1.7 | 1.7 | 1.2 | 1.2 | 0.5 | 0.5 | 0.4  | 0.6 |
| 7             | 2.7               | 2.7 | 1.9  | 1.2 | 0.6 | 2.0 | 0.8 | 2.0 | 1.2 | 0.4 | 0.5 | 0.3  | 0.6 |
| 8             | 1.9               | 1.6 | 1.3  | 0.9 | 1.8 | 1.4 | 1.2 | 1.1 | 0.9 | 0.3 | 0.3 | 0.3  | 0.4 |
| 9             | 1.4               | 1.2 | 0.84 | 0.8 | 1.0 | 1.1 | 0.6 | 0.8 | 0.6 | 0.2 | 0.2 | 0.2  | 0.3 |
| 10            | 1.6               | 1.3 | 1.1  | 0.9 | 1.0 | 1.1 | 0.9 | 0.7 | 0.6 | 0.3 | 0.2 | 0.09 | 0.3 |
| 11            | 1.6               | 1.3 | 1.0  | 0.7 | 0.7 | 1.0 | 0.6 | 0.6 | 0.5 | 0.1 | 0.1 | 0.09 | 0.2 |
| 11.5          | 2.3               | 2.0 | 1.4  | 1.0 | 0.9 | 1.3 | 0.8 | 0.8 | 0.7 | 0.2 | 0.2 | 0.1  | 0.3 |
| 12            | 3.0               | 2.4 | 1.6  | 1.1 | 0.9 | 1.3 | 1.1 | 0.7 | 0.6 | 0.2 | 0.2 | 0.2  | 0.2 |

**Table S2:** Integral cross sections (over the half-space angle) for electron induced excitation of molecules in a thin film of condensed adenine, in units of  $10^{-18} \text{ cm}^2$ . The difference between the deconvoluted energy-loss spectrum and the remaining contribution from the  $\text{EL} > 6.6 \text{ eV}$  is given in the last column.

| $E_0$ (eV) | Energy loss (eV) |     |     |      |       | Residue |
|------------|------------------|-----|-----|------|-------|---------|
|            | 4.7              | 5.0 | 5.5 | 6.1  | 6.6   |         |
| 8          | 4.3              | 8.8 | 7.3 | 10.6 | 4.1   | 0.04    |
| 9          | 4.4              | 5.4 | 4.2 | 8.4  | 5.0   | 3.4     |
| 10         | 3.9              | 6.9 | 5.1 | 8.3  | 7.3   | 4.5     |
| 11         | 3.6              | 4.1 | 3.6 | 7.7  | 6.3   | 3.4     |
| 11.5       | 4.2              | 5.9 | 3.7 | 9.3  | 8.3   | 4.7     |
| 12         | 3.8              | 5.5 | 3.5 | 7.7  | 3.2 * | 5.0     |
